# Supplementary material for: It’s Personal: Biology Instructors Prioritize Personal Evidence over Empirical Evidence in Teaching Decisions
Source: Atypon-hosted journal article supplement (doi:10.1187/cbe.14-05-0084), 2015-03-02
Supplement: combinedsupmats.pdf [file combinedsupmats.pdf]

# Supplemental Material

*CBE—Life Sciences Education*

Andrews *et al.*

## Appendix A—Interview questions

These questions were asked in a semi-structured interview. Interviewers conducting semi-structured interviews use a set list of questions, but adapt the delivery of the questions to maintain a natural flow of conversation with the interviewee. We asked the numbered question in each interview and asked the lettered questions as necessary to elicit thorough answers.

1. At what institution do you teach?
2. What type of position do you hold?
3. What courses do you teach and what size are your classes?
4. How long have you been teaching?
5. How did you learn about the NCCSTS Fall Conference?
6. How long after you learned about this conference did you decide to attend?
7. What (or who) influenced your decision to attend the NCCSTS Fall Conference?
  - a. People? Why was [person] influential in your decision?
  - b. Experiences? Why was [experience] influential in our decision?
  - c. Sources of information? Why was [source of information] influential in our decision?
8. Were there other teaching professional development workshops or conferences you considered attending? If so, why did you decide to attend this one?
9. Have you also attended other teaching professional development workshops or conferences?
10. What goals and expectations do you have for attending the Fall Conference?
  - a. [For those interview during or after the conference]: What were your expectations of the Conference before you came?
11. How did you first learn about case study teaching?
  - a. Where and when?
  - b. From whom or what sources of information did you learn about case study teaching?
12. Can you define case study teaching in 2 or 3 sentences?
  - a. Probe for definitions of jargon like ‘case studies,’ ‘active learning,’ ‘inquiry.’
13. Since learning about case study teaching, have you talked with colleagues at your institution (or at other institutions) about case study teaching?
  - a. If so, what did you talk about?
  - b. Do these colleagues use case study teaching?
  - c. Were these conversations useful to you? Why or why not?
14. What evidence have you seen regarding case study teaching?
  - a. Where did you encounter this evidence?
  - b. When?
  - c. What conclusions were drawn from this evidence?
15. Have you ever observed another teacher using case study teaching?
  - a. Who?
  - b. When?
  - c. Why?
16. How do you expect your colleagues and administrators to respond to your use of case study teaching?
17. Aside from what you’ve heard at this conference, have you ever heard other people promoting case study teaching?
  - a. If so, who?
  - b. How did what they said influence you?
18. What appeals to you about case study teaching?
19. Given your plans for using case study teaching hereafter, what concerns do you have about implementing your plans?
20. What challenges or barriers do you foresee in implementing case study teaching?

21. How do you intend to deal with the challenges you foresee?
22. Who could help you address these challenges, and what could this person do?
23. How does case study teaching differ from other teaching methods you commonly use (or have used in the past)?
24. How do you think case study teaching will be (or is) better for you? For the students?
25. How do you think case study teaching will be (or is) worse for you? For the students?
26. What value do you expect case study teaching to add to your teaching?
27. How do you feel about your ability to use case studies effectively?
  - a. Why do you feel that way?
  - b. Experiences?
  - c. Evidence?
28. How do you know if you are using case studies effectively?
29. What else would you like to learn regarding case study teaching?
30. Is there anything else you think I need to know about your experience with case study teaching?

**Questions specific to novice case study users:**

1. You say you've not used case studies before. Do you think you will use case studies after this conference?
2. How do you think you will use case studies after this conference?
  - a. Probe for rationale behind the way they use. Why do you.....? Why don't you.....?
3. What factors typically influence your instructional decisions?
  - a. Do you think those same factors will influence your decisions about case study teaching?

**Questions specific to veteran case study users:**

1. You say you've used case studies. How long?
2. Can you describe how you have used case study teaching in the past [or how you intend to use it in the future]?
  - a. Probe for rationale behind the way they use. Why do you.....? Why don't you.....?
3. How does your use of case study teaching differ from how other instructors use case studies?
4. Do you have any plans to change your use of case study teaching after this conference?
  - a. If so, how?
5. If so, what goals and expectations do you have for the changes you intend to make in your teaching?
6. What factors influence your instructional decisions regarding case study teaching?

## **Appendix B:**

### **Initial *a priori* list of categories, generated in Phase 1 of qualitative data analysis**

Adopting case study as is  
Barr\_colleague support  
Barr\_content coverage  
Barr\_student buy-in  
Barr\_time  
Beliefs  
Change in response to dissatisfaction  
Col\_colleague attitude\_don't care  
Col\_colleague attitude\_negative  
Col\_colleague attitude\_supportive  
Col\_colleague interactions\_co-instructors collaborated  
Col\_colleague interactions\_coll promoted to participant  
Col\_colleague interactions\_part promoted to colleagues  
Col\_seek knowledge from peers  
Colleague attitude  
Colleagues  
Custom\_adapting  
Custom\_lack of cust causes problems  
Custom\_reinventing  
Discomfort from implementing change  
Discontinuance  
Endorsement by a respected expert  
Evid\_interp as data from literature  
Evid\_interp as peer experience  
Evid\_interp at personal experience  
Evid\_qualified personal experience  
Evid\_valued personal exp over data  
Ext factors\_curr/program  
Ext factors\_deans  
Ext factors\_dept head  
Ext factors\_tenure  
Know seeking\_awareness  
Know seeking\_how-to  
Know seeking\_principles  
Seeking knowledge from peers  
Seeking vicarious experience using cases  
Self concern prioritized over concern for students  
Self efficacy\_high  
Self efficacy\_low  
Self efficacy\_med  
Trying cases on a small scale

## **Appendix C:**

### **Final list of categories, generated in Phase 2 of qualitative data analysis**

Accommodating knowledge of case studies  
Adopting case study as is  
Affordances\_administrators  
Affordances\_culture  
Affordances\_curriculum  
Affordances\_institution  
Affordances\_tenure.promotion  
Affordances\_top down promotion  
Awareness Knowledge\_Grad School  
Barr\_administrators  
Barr\_assessment  
Barr\_classroom management  
Barr\_content coverage  
Barr\_culture  
Barr\_curriculum  
Barr\_discipline  
Barr\_faculty buy-in  
Barr\_funding for professional development  
Barr\_funding for technology  
Barr\_institutional  
Barr\_physical space  
Barr\_politics  
Barr\_relative disadvantage  
Barr\_student buy-in  
Barr\_tenure.promotion  
Barr\_time  
Barr\_uncertainty about reception by colleagues and/or admin  
Barr\_variable case quality  
Beliefs  
Beliefs\_relevant to barriers  
Beliefs\_relevant to perceptions of outcomes  
Col\_colleague attitude\_don't care  
Col\_colleague attitude\_negative  
Col\_colleague attitude\_supportive  
Col\_colleague interactions\_co-instructors collaborated  
Col\_colleague interactions\_I've seen them using cases  
Col\_colleague interactions\_none yet  
Col\_colleague interactions\_not useful  
Col\_colleague interactions\_part promoted to colleagues  
Col\_colleague interactions\_useful sharing  
Col\_use case studies  
Compatibility  
Complexity

Custom\_adapting  
Custom\_lack of cust causes problems  
Custom\_reinventing  
Custom\_writing new cases  
Data convinces instructors to change  
Def\_anything but lecture  
Def\_Apply content  
Def\_critical thinking  
Def\_Figure out  
Def\_making connections among concepts  
Def\_problem  
Def\_Real-life scenario  
Def\_story  
Desiring a network of case study users  
Endorsement by a trusted person leads to positive attitude energized  
Expert knowledge on how people learn  
Ext factors  
How will you know if you're effective  
I've naturally taught this way  
I've read some literature  
I want practice  
I want to see others using cases \_Seeking vicarious  
If other people can do it, so can I  
Institutional description  
It's only anecdotal, but  
Know seeking\_awareness-new ideas  
Know seeking\_principles  
Know\_How do others...  
Know\_how do you integrate labs and classes  
Know\_how to assess  
Know\_how to keep students accountable in group work  
Know\_how to lead discussions  
Know\_how to make it work in the classroom  
Know\_how to match delivery and topic  
Know\_how to put more math in  
Know\_how to set up groups  
Know\_how to use cases as the primary strategy for delivering content  
Know\_how to use cases online  
Know\_how to use cases to make connections throughout a semester  
Know\_how to write cases  
Know\_how to write the syllabus differently  
Know\_is there a better way than reading to my students  
Lecturing boring  
Motiv\_Case studies fill need for materials  
Motiv\_Change in response to dissatisfaction

My experience trumps research  
Rel\_adv\_active\_ not just listening  
Rel\_adv\_broad or vague  
Rel\_adv\_critical thinking  
Rel\_adv\_depth  
Rel\_adv\_engaged  
Rel\_adv\_ethics  
Rel\_adv\_fun for instructor  
Rel\_adv\_group discussion  
Rel\_adv\_nature of science  
Rel\_adv\_real world application  
Rel\_adv\_story  
Rel\_adv\_student responsibility  
Self concern prioritized in teaching decisions  
Self efficacy\_high  
Self efficacy\_low  
Self efficacy\_med  
Skeptical  
Student learning prioritized in teaching decisions  
Students say I like it  
Teacher reports intuition that it works  
Teacher reports student engagement  
Teacher reports student learning  
Teacher reports student learning: quantitative evidence  
Tried and revised

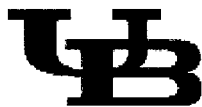

***National Center for Case Study Teaching in Science***

University at Buffalo, State University of New York

Buffalo, New York 14260

(716) 645-4900

August 11, 2014

Dr. Debra Tomanek  
CBE-LSE Monitoring Editor

Dear Dr. Tomanek,

I have been in correspondence with Paula Lemons about the Andrews' and Lemons' paper, *It's personal: Biology instructors prioritize personal evidence over empirical evidence in teaching decisions*. As the Co-Director for the National Center for Case Study Teaching in Science, I maintain records about the number of users of, and visits to, our case library and website, as well as the number of individuals who have participated in professional development opportunities we offer. I give my permission for Andrews and Lemons to cite these numbers in the text of their paper.

Sincerely,

A handwritten signature in black ink that reads "Nancy A. Schiller". The signature is written in a cursive, flowing style.

Nancy A. Schiller  
Co-Director, National Center for Case Study Teaching in Science  
University at Buffalo, State University of New York
